# Supplementary material for: Electrocatalytic Degradation of Phenolic Wastewater Using a Zero-Gap Flow-Through Reactor Coupled with a 3D Ti/RuO2-TiO2@Pt Electrode
Source: MDPI journal article supplement (doi:10.3390/molecules29051182), 2024-03-06
Supplement: s1 [file s1]

# **Electrocatalytic Degradation of Phenolic Wastewater using a Zero-Gap Flow-through Reactor Coupled with a 3D Ti/RuO<sub>2</sub>-TiO<sub>2</sub>@Pt Electrode**

**Yunqing Zhu \*, Kaiyue Wen, Bingqing Li, Yirong Hao, Jianjun Zhou**

School of Environmental Science and Engineering, Shaanxi University of Science and  
Technology, Xian 710021, PR China

**\*Corresponding author: Yunqing Zhu**

Email address: zhuyunqing@sust.edu.cn

**Table S1**

Parameters of the pseudo-first order kinetic model for electrocatalytic oxidation of phenol with the zero-gap flow-through reactor.

| <b>pollutant</b> | <b>Variables</b>                      | <b>Range</b>                    | <b>k (min<sup>-1</sup> )</b> | <b>R<sup>2</sup></b> |
|------------------|---------------------------------------|---------------------------------|------------------------------|----------------------|
| phenol           | electrolyte                           | Na <sub>2</sub> SO <sub>4</sub> | 0.0077                       | 0.9899               |
|                  |                                       | NaCl                            | 0.2562                       | 0.9999               |
|                  |                                       | Blank                           | 0.0046                       | 0.9953               |
|                  | NaCl (g/L)                            | 4                               | 0.1205                       | 0.9988               |
|                  |                                       | 6                               | 0.1675                       | 0.9981               |
|                  |                                       | 8                               | 0.2074                       | 0.9981               |
|                  |                                       | 10                              | 0.2562                       | 0.9999               |
|                  |                                       | 5                               | 0.0100                       | 0.9972               |
|                  | current density (mA/cm <sup>2</sup> ) | 10                              | 0.2562                       | 0.9999               |
|                  |                                       | 15                              | 0.2931                       | 0.9987               |
|                  |                                       | 20                              | 0.4718                       | 0.9998               |
|                  |                                       | 50                              | 0.2562                       | 0.9999               |
|                  | initial concentration<br>(mg/L)       | 100                             | 0.0964                       | 0.9921               |
|                  |                                       | 150                             | 0.0630                       | 0.9988               |
|                  |                                       | 200                             | 0.0421                       | 0.9997               |
|                  |                                       | 3                               | 0.1777                       | 0.9930               |
|                  | pH                                    | 5                               | 0.2554                       | 0.9998               |
|                  |                                       | 7                               | 0.2562                       | 0.9999               |
|                  |                                       | 9                               | 0.2492                       | 0.9998               |
|                  |                                       | 11                              | 0.1316                       | 0.9942               |
|                  | Flow-through reactor                  | /                               | 0.2562                       | 0.9999               |
|                  | Conventional electrolyzer             | /                               | 0.0708                       | 0.9938               |

**Table S2**

Parameters of the pseudo-first order kinetic model for electrocatalytic oxidation of 4-NP with the zero-gap flow-through reactor.

| <b>pollutant</b> | <b>Variables</b>                      | <b>Range</b>                    | <b>k (min<sup>-1</sup> )</b> | <b>R<sup>2</sup></b> |
|------------------|---------------------------------------|---------------------------------|------------------------------|----------------------|
| 4-NP             | electrolyte                           | Na <sub>2</sub> SO <sub>4</sub> | 0.0361                       | 0.9806               |
|                  |                                       | NaCl                            | 0.1736                       | 0.9734               |
|                  |                                       | Blank                           | 0.0074                       | 0.9863               |
|                  | NaCl (g/L)                            | 4                               | 0.0780                       | 0.9664               |
|                  |                                       | 6                               | 0.0926                       | 0.9543               |
|                  |                                       | 8                               | 0.0959                       | 0.9386               |
|                  |                                       | 10                              | 0.1736                       | 0.9737               |
|                  |                                       | 5                               | 0.0629                       | 0.9567               |
|                  | current density (mA/cm <sup>2</sup> ) | 10                              | 0.1736                       | 0.9737               |
|                  |                                       | 15                              | 0.1773                       | 0.9715               |
|                  |                                       | 20                              | 0.1911                       | 0.9680               |
|                  |                                       | 40                              | 0.1736                       | 0.9737               |
|                  | initial concentration (mg/L)          | 60                              | 0.0852                       | 0.9773               |
|                  |                                       | 80                              | 0.0599                       | 0.9587               |
|                  |                                       | 100                             | 0.0428                       | 0.9303               |
|                  |                                       | 3                               | 0.1736                       | 0.9737               |
|                  | pH                                    | 5                               | 0.1316                       | 0.9525               |
|                  |                                       | 7                               | 0.0900                       | 0.9412               |
|                  |                                       | 9                               | 0.0425                       | 0.9263               |
|                  | Flow-through reactor                  | /                               | 0.1736                       | 0.9737               |
|                  | Conventional electrolyzer             | /                               | 0.1018                       | 0.9788               |

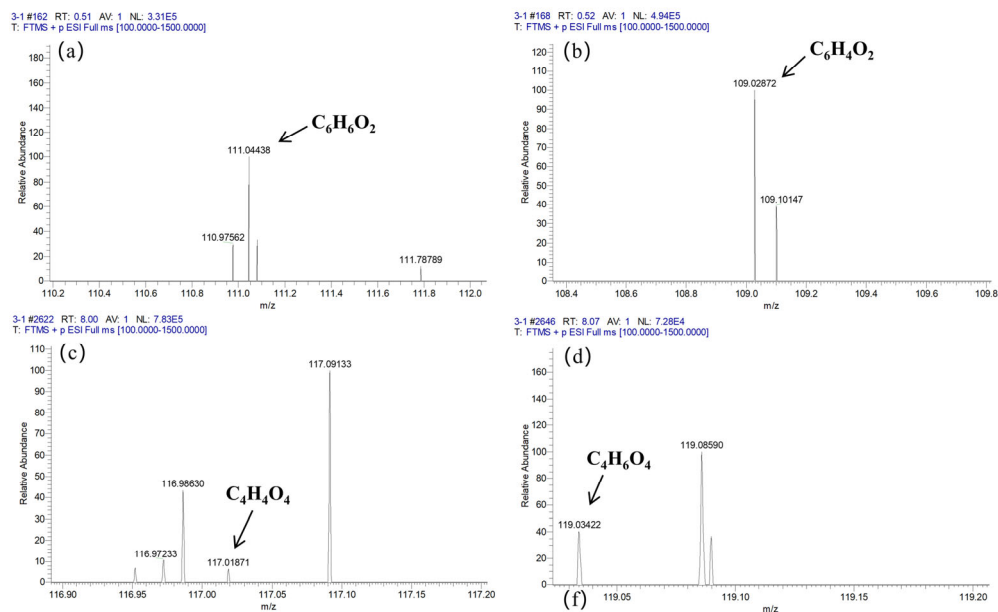

**Figure S1.** LC-MS spectrum for mentioned intermediates of phenol.

4-1 #174 RT: 0.54 AV: 1 NL: 2.74E5  
T: FTMS + p ESI Full ms [100.0000-1500.0000]

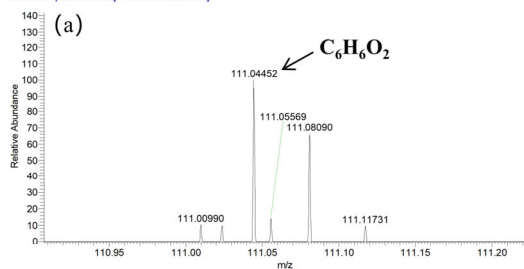

4-1 #702 RT: 2.16 AV: 1 NL: 2.67E4  
T: FTMS + p ESI Full ms [100.0000-1500.0000]

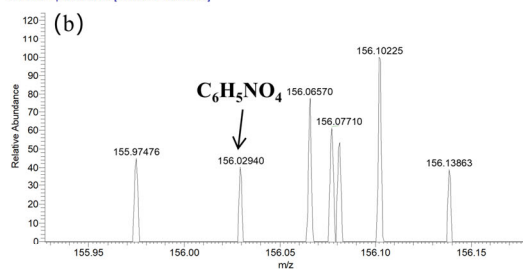

4-1 #168 RT: 0.53 AV: 1 NL: 2.09E6  
T: FTMS + p ESI Full ms [100.0000-1500.0000]

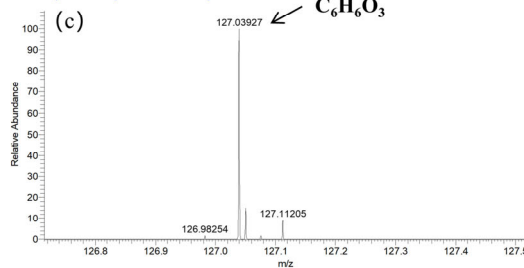

4-1 #156 RT: 0.49 AV: 1 NL: 4.91E5  
T: FTMS + p ESI Full ms [100.0000-1500.0000]

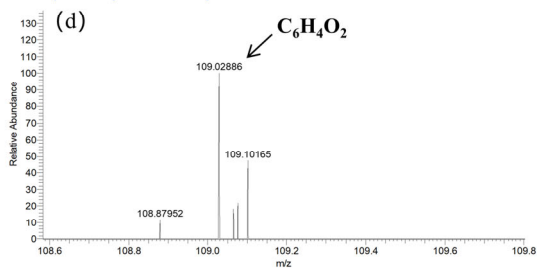

4-1 #4182 RT: 12.72 AV: 1 NL: 7.11E4  
T: FTMS + p ESI Full ms [100.0000-1500.0000]

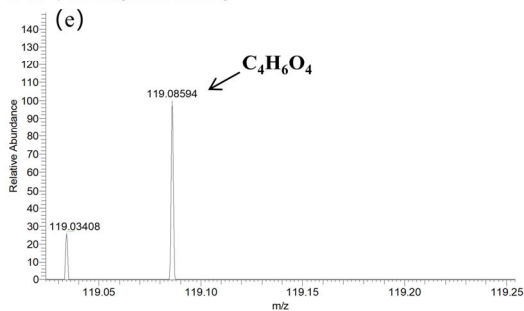

4-1 #1890 RT: 5.79 AV: 1 NL: 2.37E5  
T: FTMS + p ESI Full ms [100.0000-1500.0000]

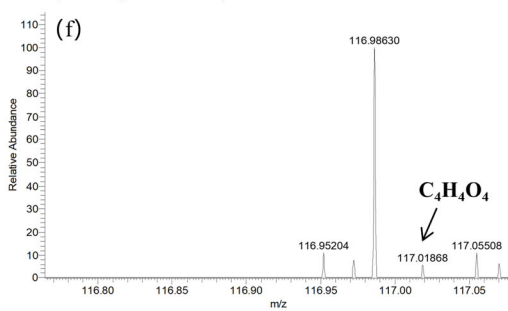

Figure S2. LC-MS spectrum for mentioned intermediates of 4-NP.



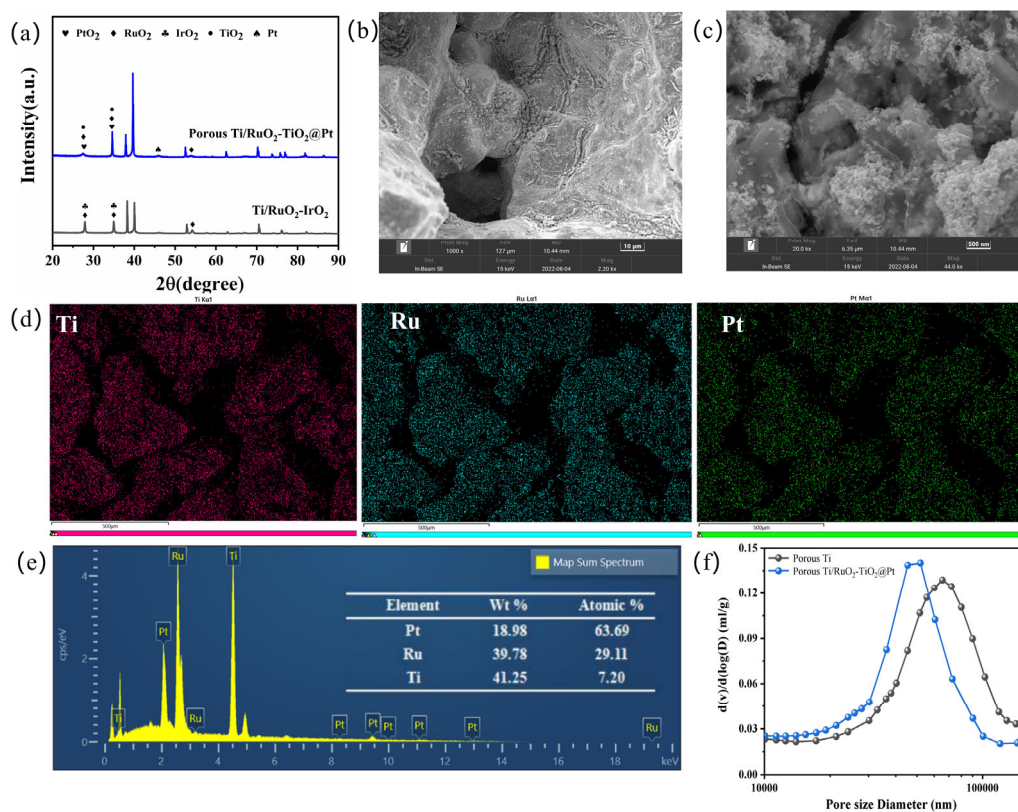

**Figure S4.** XRD patterns of porous Ti/RuO<sub>2</sub>-TiO<sub>2</sub>@Pt (a). SEM images of porous Ti/RuO<sub>2</sub>-TiO<sub>2</sub>@Pt at different magnifications (b,c). EDS elemental mappings (d) and EDS spectrum (e) of porous Ti/RuO<sub>2</sub>-TiO<sub>2</sub>@Pt. (f) Mercury compression analysis of porous Ti/RuO<sub>2</sub>-TiO<sub>2</sub>@Pt.

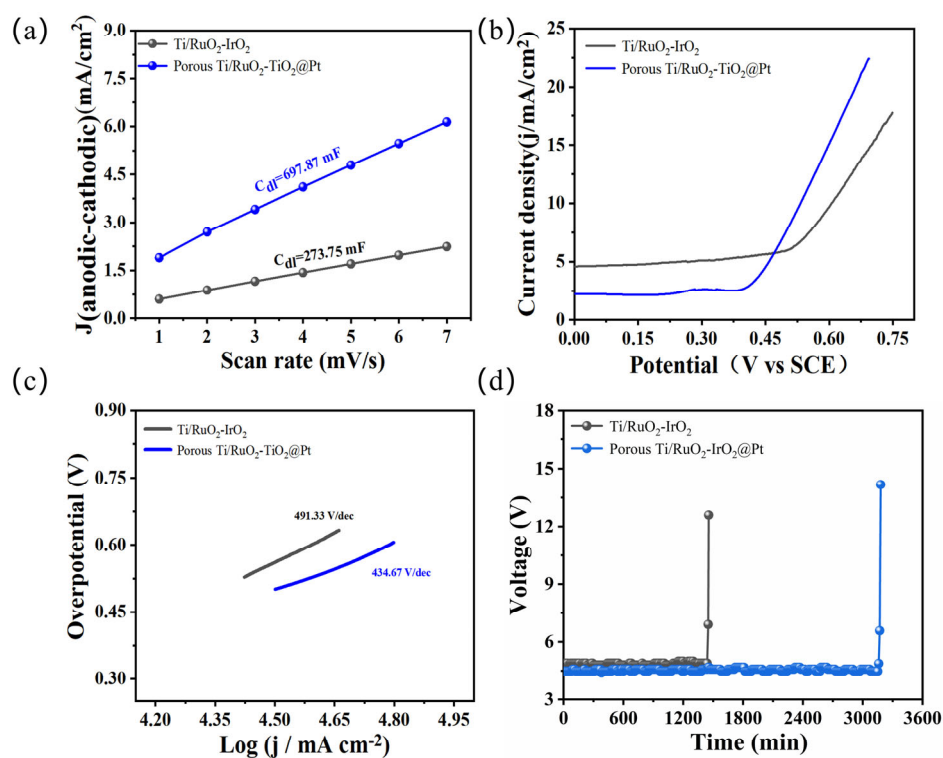

**Figure S5.** The electric double-layer capacitance diagram (a), LSV curves (b), Tafel curves (c) of porous Ti/RuO<sub>2</sub>-TiO<sub>2</sub>@Pt and Ti/RuO<sub>2</sub>-IrO<sub>2</sub> electrodes. (d) Accelerated life test of the prepared electrodes at 2 A/cm<sup>2</sup> in 1 mol/L H<sub>2</sub>SO<sub>4</sub> at 40 °C.



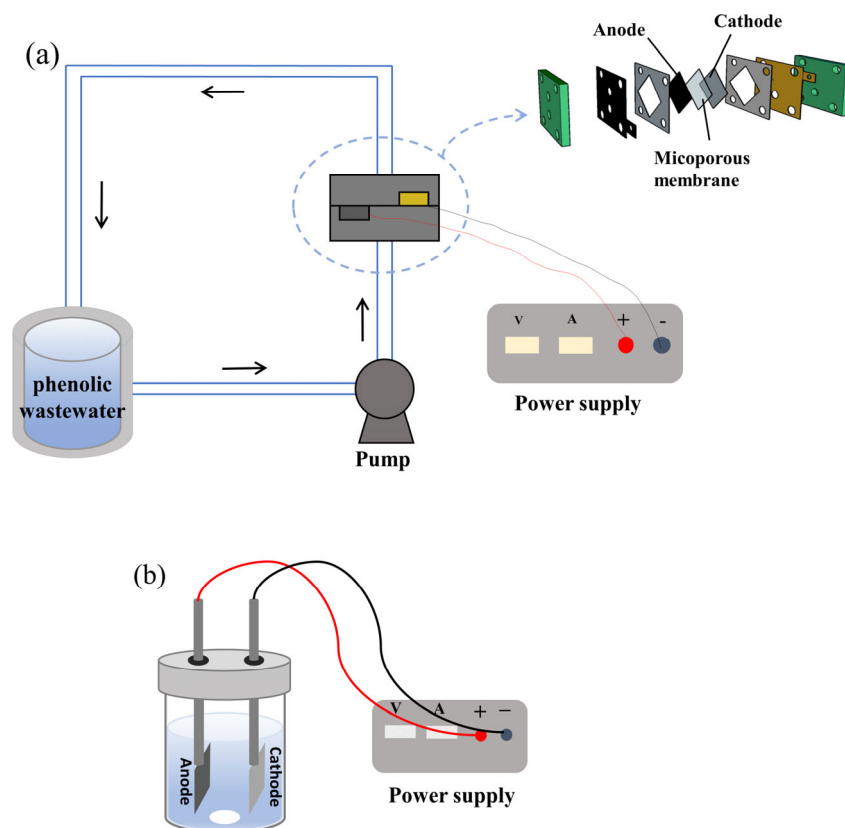

**Figure S6.** Scheme of the electrochemical systems. (a) zero-gap flow-through reactor; (b) conventional electrolyzer. Anode: 3D porous Ti/RuO<sub>2</sub>-IrO<sub>2</sub>@Pt and cathode: porous titanium plate.
